# Supplementary material for: Palladium(ii) chloride catalyzed selective acetylation of alcohols with vinyl acetateElectronic supplementary information (ESI) available: 1H, 13C NMR and IR spectral data of 4b, 1H NMR, elemental analysis and IR spectral data of 5b; 1H and IR spectral data of 1b, 2b, 3b, 6b, 7b, 8b, 9b, 11b and 13b. See http://www.rsc.org/suppdata/cc/b4/b401218f/
Source: Royal Society of Chemistry journal article supplement (doi:10.1039/b401218f), 2004-01-01
Supplement: b401218f.doc [file b401218f.doc]

**Supplementary Information: 1H NMR, 13C NMR and IR spectral data of compound 4b, 1H NMR, elemental analysis and IR spectral data of compound 5b; 1H and IR spectral data of compounds 1b, 2b, 3b, 6b, 7b, 8b, 9b, 11b and 13b.**

**1. Benzyl acetate**: : 1H NMR (60 MHz, CDCl3): δ 2.05 (s, 3H, -O-CO-CH3), 4.8 (s, 2H, -CH2-O-), 7.0 (m, 4H, aromatic); IR: 2960, 1746, 1495, 1383, 1234, 1096, 1014 cm-1.

**2. *p*-Methoxybenzyl acetate**: 1H NMR (400 MHz, CDCl3): δ 2.07 (s, 3H, -O-CO-CH3), 3.80 (s, 3H, O-CH3), 5.04 (s, 2H, -CH2-O-), 6.88(d, *J*=8.40Hz, 2H, -Ph), 7.30 (d, *J*=8.40Hz, 2H, -Ph); IR: 2950, 1736, 1516, 1245, 1173, 1040 cm-1.

**3. *p*-Chlorobenzyl acetate (4b)**: 1H NMR (60 MHz, CDCl3): δ 1.95 (s, 3H, -O-CO-CH3), 4.8 (s, 2H, -CH2-O-), 7.0 (m, 4H, aromatic); IR: 2960, 1746, 1495, 1383, 1234, 1096, 1014 cm-1.

**4. 4-Benzyloxy butyl acetate**: 1H NMR (300 MHz, CDCl3): δ 1.42(m, 2H, -CH2-), 1.62 (m, 4H, 2-CH2-), 2.04 (s, 3H, -O-COCH3), 3.47(t, *J*=6.30Hz, 2H, O-CH2-), 4.05(t, *J*=6.60Hz, 2H, O-CH2-); 4.50 (s, 2H, -CH2Ph), 7.30 (s, 5H, -Ph); 13C NMR (300 MHz, CDCl3): 171.2, 138.5, 128.3(2C), 127.6(2C), 127.5, 72.9, 70.1, 64.5, 29.12, 28.41, 22.67, 20.98; IR: 2930, 2853, 1737, 1240, 1096, 1061, 1030 cm-1.

**5. Decyl acetate**: 1H NMR (60 MHz, CDCl3): δ 0.6-1.5 (br, 19H, 8-CH2-, -CH3), 1.95 (s, 3H, O-COCH3), 3.85 (t, *J*= 6.40 Hz, 2H, -OCH2-), 7.30; IR: 2918, 1740, 1236, 1039 cm-1. ; Anal. Calculated for C12H24O2: C, 71.95; H, 12.08. Found: C, 71.78; H, 12.26.

**6. Menthyl acetate**: 1H NMR (300 MHz, CDCl3): δ 0.77 (d, J=6.9 Hz, 3H, 2-CH3), 0.90(d, *J*=7.2 Hz, 6H, 2-CH3), 1.00-1.90(m, 9H, 3-CH-, 3-CH2-), 2.09 (s, 3H, -OCOCH3), 4.67 (dt, *J*=10.8 and 4.5 Hz, 1H, O-CH-); IR: 2955, 1741, 1244, 1029 cm-1.

**7. Cyclohexyl acetate:** 1H NMR (300 MHz, CDCl3): δ 1.25-1.41 (m, 4H, 2-CH2-), 1.70-1.1.86 (m, 4H, 2-CH2-), 2.03 (s, 3H, -OCOCH3), 4.75 (m, 1H, -O-CH-); IR: 2929, 2848, 1752, 1465, 1224 cm-1.

**8. 1-Acetoxy-1-phenyl-ethane**: 1H NMR (300 MHz, CDCl3): δ 1.53 (d, *J*=6.30 Hz, 3H, -CH3), 2.07 (s, 3H, O-CO-CH3), 5.90 (q, J= 6.60 Hz, 1H, O-CH-), 7.34 (m, 5H, aromatic); IR: : 2986, 1747, 1378, 1240, 1066 cm-1.

**9. 4-Cenamyl acetate**: 1H NMR (300 MHz, CDCl3): δ 2.90 (s, 3H, -O-COCH3), 4.72(d, *J*=6.30Hz, 2H, O-CH2-), 4.05(dt, *J*=12.90 and 6.60Hz, 2H, -CH-), 6.64 (d, *J*=15.90 Hz, -CH-); 7.31 (s, 5H, -Ph); IR: 3032, 2996, 2940, 2873, 1736, 1454, 1352, 1244, 1029 cm-1.

**10. 2-Acetoxy ethane thiol:** 1H NMR (300 MHz, CDCl3): δ 2.05 (s, 3H, O-CO-CH3), 2.75 (dt, *J*=9.00 & 6.00 Hz, 2H, S-CH2-), 4.19 (t, J=6.6 Hz, 2H, -CH2-); IR: 3042, 1741, 1377, 1239, 1025 cm-1.

**11. 1-Acetoxy-2-(4-hydroxyphenyl)-ethane:** 1H NMR (400 MHz, CDCl3): δ 2.05 (s, 3H, -O-COCH3), 2.86 (t, *J*=6.80Hz, 2H, -CH2-), 4.23(t, *J*=6.80Hz, 2H, -CH2-OAc), 5.14 (s, br, 1H, -OH), 6.76 (d, *J*=8.00Hz, 2H, -Ph), 7.07 (d, *J*=8.80Hz, 2H, -Ph); IR: 3421, 3021, 2960, 1721, 1516, 1449, 1372, 1254, 1034 cm-1.
